# Supplementary material for: Chromosome-level assembly of the mustache toad genome using third-generation DNA sequencing and Hi-C analysis
Source: PubMed Central journal article supplement (PMC6755253; doi:10.1093/gigascience/giz114), 2019-09-23
Supplement: giz114_response_to_reviewer_comments_revision_1.pdf [file giz114_response_to_reviewer_comments_revision_1.pdf]

# Author's Response To Reviewer Comments

Close

All the comments in this version have been corrected.

Close
